# Supplementary material for: Concentrated Pickering emulsions stabilised by hemp globulin–caseinate nanoparticles: tuning the rheological properties by adjusting the hemp globulin : caseinate ratio
Source: Royal Society of Chemistry journal article supplement (doi:10.1039/d0fo01745k), 2020-01-01
Supplement: d0fo01745k1.pdf [file d0fo01745k1.pdf]

## Supplemental information

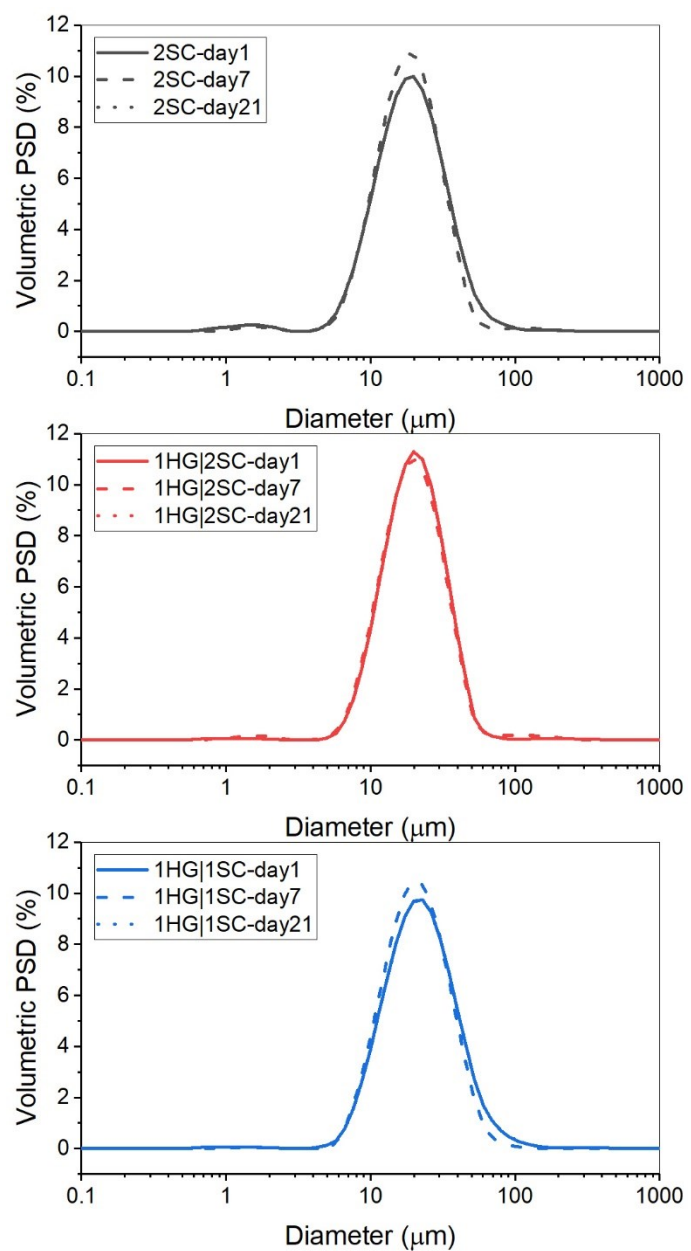

**Supplemental information 1** Droplet size distributions of the Pickering emulsions.

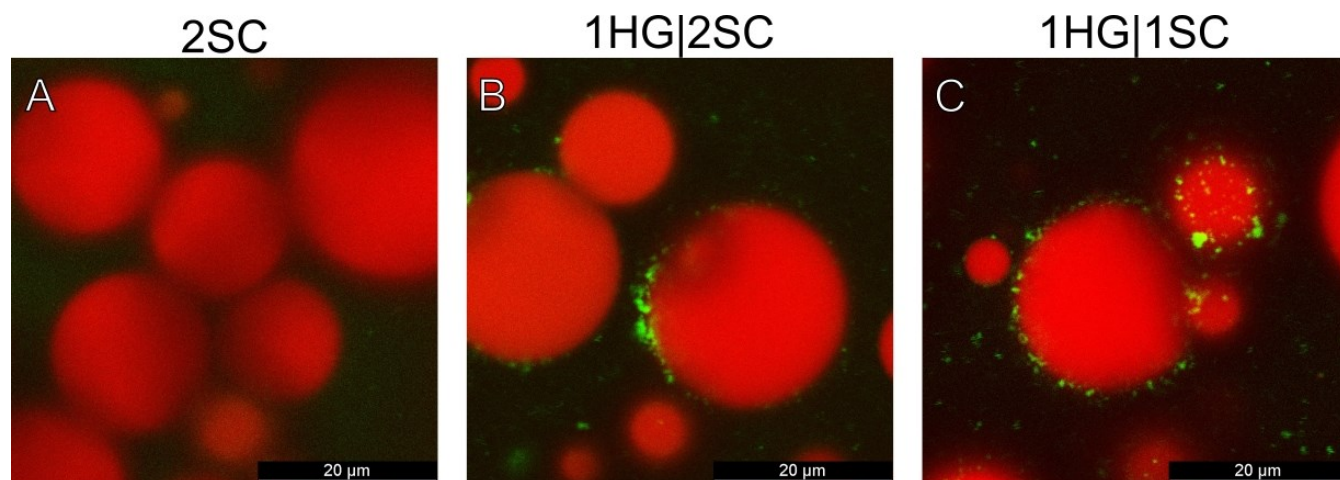

**Supplemental information 2** CLSM micrographs of diluted (5x) Pickering emulsions after 21 days of storage.

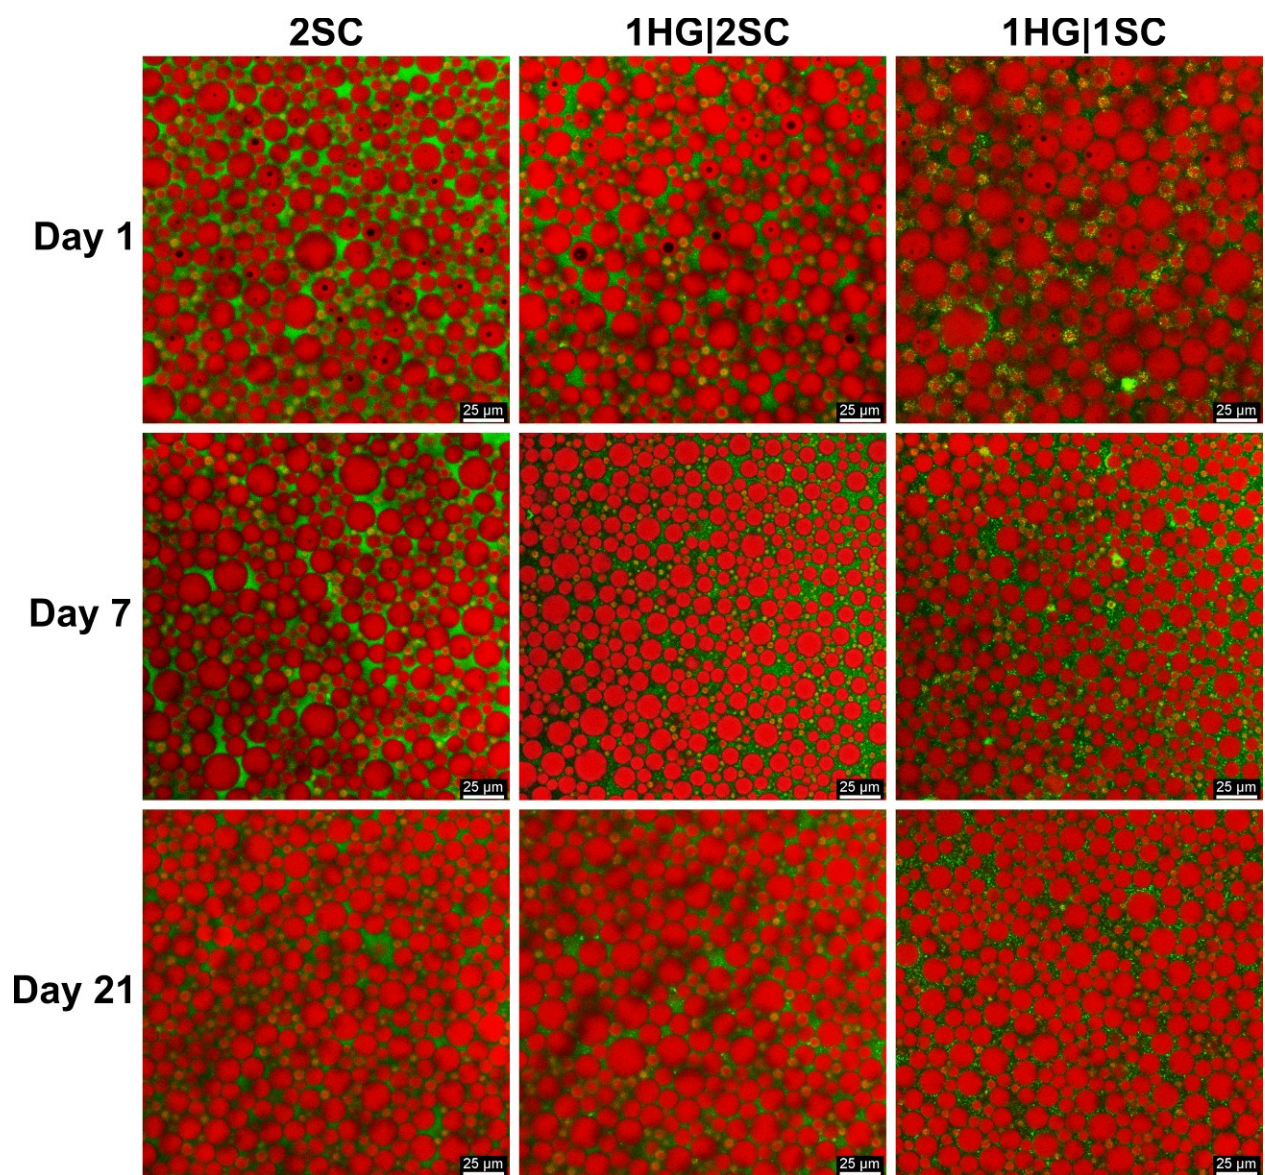

**Supplemental information 3** 63x CLSM micrographs of the Pickering emulsions during 21 days of storage.
